# Supplementary material for: Novel Lung Targeting Cell Penetrating Peptides as Vectors for Delivery of Therapeutics
Source: Research Square preprint supplement (doi:10.21203/rs.3.rs-1056707/v1), 2021-11-15
Supplement: Supplementary file [file ff923b542dc6ceb96173749b.pdf]

## **Novel Lung Targeting Cell Penetrating Peptides as Vectors for Delivery of Therapeutics**

Kayla McCandless, Sanjay Mishra, Jeffrey Stiltner, Kyle S. Feldman, Hisato Yagi, Ray Yurko,  
Kazi Islam, Jonathan Brown, Raymond Frizzell, Maliha Zahid

### **Supplemental Material**

## Supplemental Results

### Supplemental Figure 1:

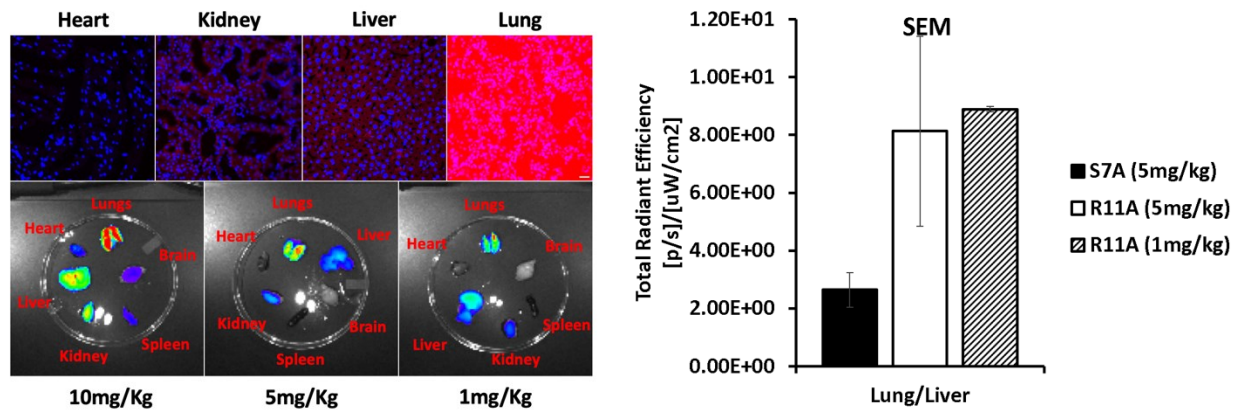

**Supplemental Figure 1:** Wild-type mice injected with 10mg/Kg of Cy5.5 labeled S7A or decreasing doses of R11A (10mg/Kg, 5mg/Kg and 1mg/Kg) R11A intravenously, euthanized at 15 mins, and multiple organs harvested for ex-vivo IVIS imaging followed by embedding, cryosectioning, counterstaining with DAPI and confocal microscopy. N=3 for each dose. Robust uptake of R11A by lung tissue is observed at even the lowest R11A dose of 1mg/Kg with lung to liver ratios improving consistently with lowering of the R11A dose.

**Supplemental Figure 2:**

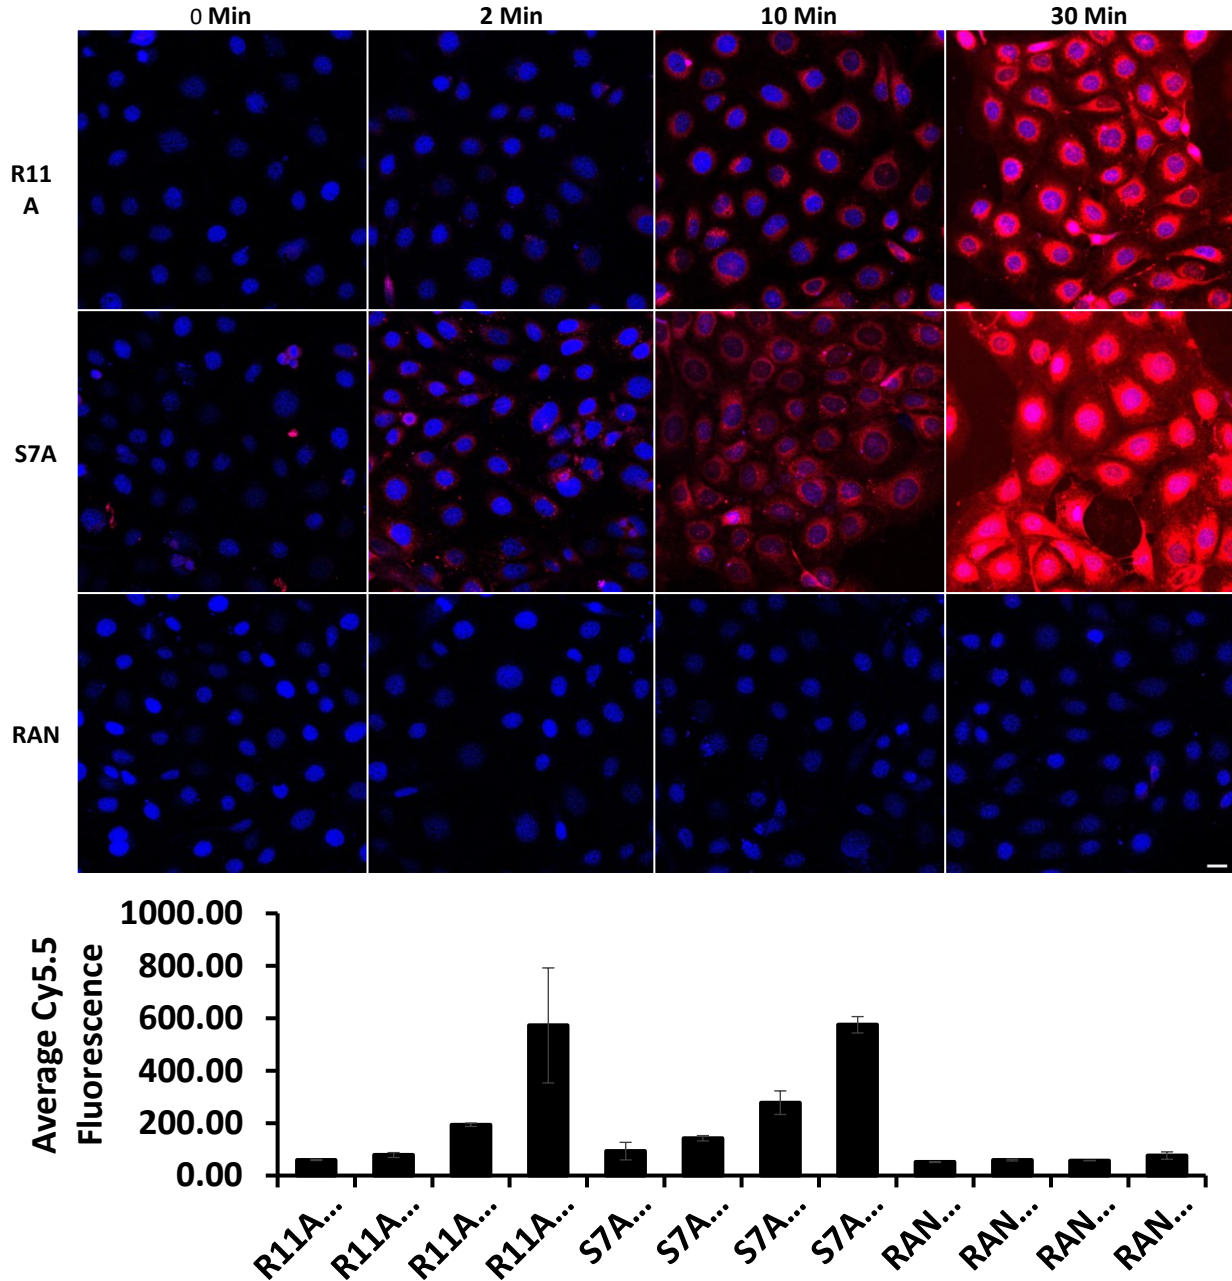

**Supplemental Figure 2:** Human bronchial epithelial cells transduced robustly with LTPs: Human bronchial epithelial cells were plated on cover slips and treated with 10 $\mu$ M of linear R11A, S7A or a scrambled random (RAN) peptide for indicated time points at 37°C, washed 3x with pre-warmed PBS, fixed, counterstained with DAPI and confocal microscopy performed. Both R11A and S7A are robustly internalized by cells by 30 mins, and appear to have a cytoplasmic, peri-nuclear localization. Random peptide has very little to no uptake.

### Supplemental Figure 3:

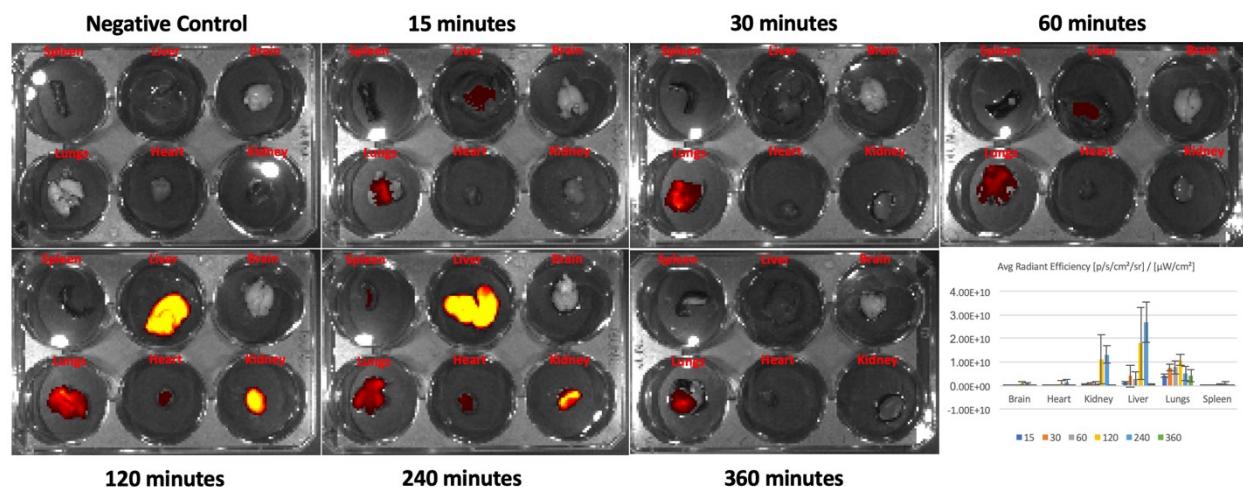

**Supplemental Figure 3:** Ex-vivo imaging of multiple organs harvested from mice injected with Cy5.5 labeled R11A (5mg/Kg) and peptide allowed to circulate for indicated time points. There is immediate lung uptake peaking at 60 mins with peptide appearing in liver at later time-points indicating predominantly biliary excretion of the peptide or it's breakdown product(s).

**Supplemental Table 1:** List of duplex siRNA and their targets tested in our study.

| Target Protein  | Target Position | Target Sequence          | RNA oligo, Guide      | Passenger             | seed-duplex stability (Tm), guide | Passenger2 | MW-Guide | MW-Passenger |
|-----------------|-----------------|--------------------------|-----------------------|-----------------------|-----------------------------------|------------|----------|--------------|
| Envelop-E1      | 70-92           | gtggtattcttgcctagttacact | UGUAACUAGCAAGAAUACCAC | GGUAUUCUUGCUAGUUACACU | 14.3                              | 14.5       | 6908     | 6833         |
| Envelop-E2      | 149-171         | gtcttgtaaaacctctttttac   | AAAAAGAAGGUUUACAAGAC  | CUUGUAAAACCUUCUUUUAC  | 5.5                               | 7.2        | 6996     | 6738         |
| Nucleocapsid-N1 | 789-811         | tgcactaaagcatacaatgtaa   | ACAUUGUAUGCUUUAGUGGCA | CCACUAAAGCAUACAAUGUAA | 13.5                              | 11.8       | 6896     | 6892         |
| Nucleocapsid-N2 | 1101-1123       | gcctaaaaaggacaaaagaaga   | UUCUUUUUGUCCUUUUAGGC  | CUAAAAAGGACAAAAAGAAGA | 5.5                               | -3.8       | 6725     | 7065         |
| Spike-S1        | 977-999         | ttgtagatttcctaattattaca  | UAAUAUUAGGAAAUCAACAA  | GUUAGAUUCCUAAUUAUACA  | -8                                | 6.9        | 6918     | 6825         |
| Spike-S2        | 2260-2282       | ttgcaatatggcagttttgtac   | ACAAAAACUGCCAUAUUGCAA | GCAAUAUGGCAGUUUUUGUAC | 5.6                               | 5.6        | 6892     | 6896         |

**Supplemental Figure 4:** MALDI-ToF analysis of cyclic R11A-siRNA-S1 showing the size and peaks of the conjugate.

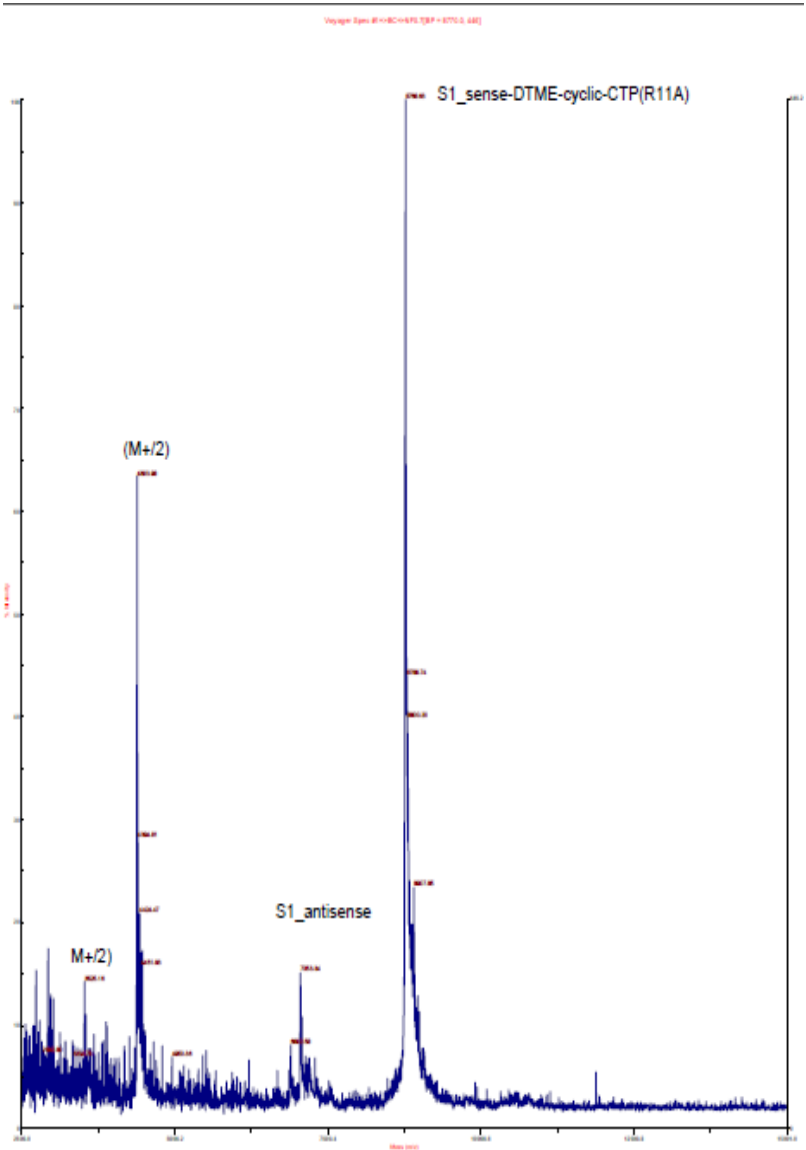

**Supplemental Table 2:** Results of VERO Cells incubated with cyclic R11A-siRNA conjugates followed by infection with SARS-CoV-2 virus.

| <b>Table 2a. Percent toxicity of University of Pittsburgh compounds on Vero 76 cells</b>            |                         |                 |                 |                 |                 |
|-----------------------------------------------------------------------------------------------------|-------------------------|-----------------|-----------------|-----------------|-----------------|
|                                                                                                     | <b>Percent Toxicity</b> |                 |                 |                 |                 |
| Conc. (μM)                                                                                          | <b>cR11A-S1</b>         | <b>cR11A-S2</b> | <b>cR11A-E2</b> | <b>cR11A-N1</b> | <b>cR11A-N2</b> |
| 100                                                                                                 | 0.0%                    | 14.4%           | 9.7%            | 0.0%            | 4.5%            |
| 10                                                                                                  | 10.1%                   | 2.8%            | 17.9%           | 0.0%            | 3.0%            |
| 1                                                                                                   | 18.1%                   | 2.8%            | 17.9%           | 0.0%            | 5.2%            |
| 0.1                                                                                                 | 14.6%                   | 2.8%            | 17.9%           | 0.0%            | 0.0%            |
|                                                                                                     |                         |                 |                 |                 |                 |
| <b>Table 2b. Percent cytopathic effect of University of Pittsburgh compounds against SARS-CoV-2</b> |                         |                 |                 |                 |                 |
|                                                                                                     | <b>Percent CPE</b>      |                 |                 |                 |                 |
| Conc. (μM)                                                                                          | <b>cR11A-S1</b>         | <b>cR11A-S2</b> | <b>cR11A-E2</b> | <b>cR11A-N1</b> | <b>cR11A-N2</b> |
| 100                                                                                                 | 57.9%                   | 64.6%           | 53.7%           | 78.6%           | 60.2%           |
| 10                                                                                                  | 87.3%                   | 89.3%           | 89.6%           | 96.9%           | 90.8%           |
| 1                                                                                                   | 90.1%                   | 93.1%           | 95.4%           | 97.6%           | 96.8%           |
| 0.1                                                                                                 | 90.1%                   | 100.0%          | 100.0%          | 95.5%           | 99.3%           |
| CPE - Cytopathic effect                                                                             |                         |                 |                 |                 |                 |
|                                                                                                     |                         |                 |                 |                 |                 |
| Compounds pretreated on cells for 24 hours prior to infection with SARS-CoV-2 virus.                |                         |                 |                 |                 |                 |

### **Supplemental References**

Reed, L.J., Muench, H., 1938. A simple method of estimating fifty percent endpoints. *The American Journal of Hygiene* 27, 493–497.
